# Supplementary material for: BRD4 inhibitors block telomere elongation
Source: PubMed Central journal article supplement — Nucleic Acids Res. 2017 Jun 30;45(14):8403–10. doi: 10.1093/nar/gkx561 (PMC5737673; doi:10.1093/nar/gkx561), 2017-06-30
Supplement: gkx561_supp.pdf [file gkx561_supp.pdf]

| Compound        | Target               | Selleckchem Catalogue No. | Notes                                                            |
|-----------------|----------------------|---------------------------|------------------------------------------------------------------|
| MK-2206 2HCl    | AKT                  | S1078                     | Allosteric inhibitor activated by the pleckstrin homology domain |
| BI 2536         | PLK1                 | S1109                     | Inhibits PLK1, inhibits BRD4 kinase                              |
| Sorafenib       | VEGFR, RAF           | S1040                     | Multikinase inhibitor of Raf-1, B-Raf and VEGFR-2                |
| Staurosporine   | PKC                  | S1421                     | PKC inhibitor for PKC $\alpha$ , PKC $\gamma$ and PKC $\eta$     |
| Ruxolitinib     | JAK1/2               | S1378                     | Kinase inhibitor                                                 |
| Rapamycin       | mTOR                 | S1039                     | Binds FKBP12, which inhibits mTOR                                |
| Selumetinib     | ERK/MEK              | S1008                     | Non-ATP Competitive inhibitor                                    |
| CHIR-99021      | GSK-3 $\alpha/\beta$ | S2924                     | ATP competitive inhibitor                                        |
| Cerdulatinib    | TYK2                 | S7634                     | Also targets JAK1/JAK2/JAK3/ and Syk                             |
| TG003           | CLK                  | S7320                     | ATP competitive inhibitor                                        |
| WZ4003          | NUAK                 | S7317                     | Targets NUAK1 and NUAK2                                          |
| SCH772984       | ERK1/2               | S7101                     | ATP competitive inhibitor                                        |
| PD98059         | MEK                  | S1177                     | Non-ATP competitive inhibitor                                    |
| ML141           | CDC42                | S7686                     | Reversible non-competitive inhibitor                             |
| Enzastaurin     | PKC                  | S1055                     | PKC $\beta$ selective inhibitor                                  |
| BI-D1870        | RSK1/2/3/4           | S2843                     | ATP-competitive inhibitor                                        |
| KN-93 Phosphate | CaMKII               | S7423                     | No effect on APK, PKC, MLCK or Ca <sup>2+</sup> -PDE             |
| CID755673       | PKD1/2/3             | S7188                     | Cell-active pan-PKD1/2/3 inhibitor                               |
| FR 180204       | ERK                  | S7524                     | ATP-competitive inhibitor                                        |
| Alisertib       | AURKA                | S1133                     | >200-fold higher selectivity for Aurora A than Aurora B          |
| LDC000067       | CDK9                 | S7461                     | >227-fold selectivity over CDK2/1/4/6/7                          |
| SNS-032         | CDK2/7/9             | S1145                     | Reversible inhibitor                                             |
| H 89 2HCl       | PKA                  | S1582                     | Also inhibits CaMKII, CK1, MYLK                                  |
| SB203580        | p38 MAPK             | S1076                     | Also blocks AKT                                                  |
| BAY 80-6946     | PI3K                 | S2802                     | Pan-class I PI3K inhibitor                                       |
| HTH-01-015      | NUAK1                | S7318                     | Selective for NUAK1 over NUAK2                                   |

**Supplemental Table 1.** Compounds that did not block telomere elongation by telomerase overexpression.

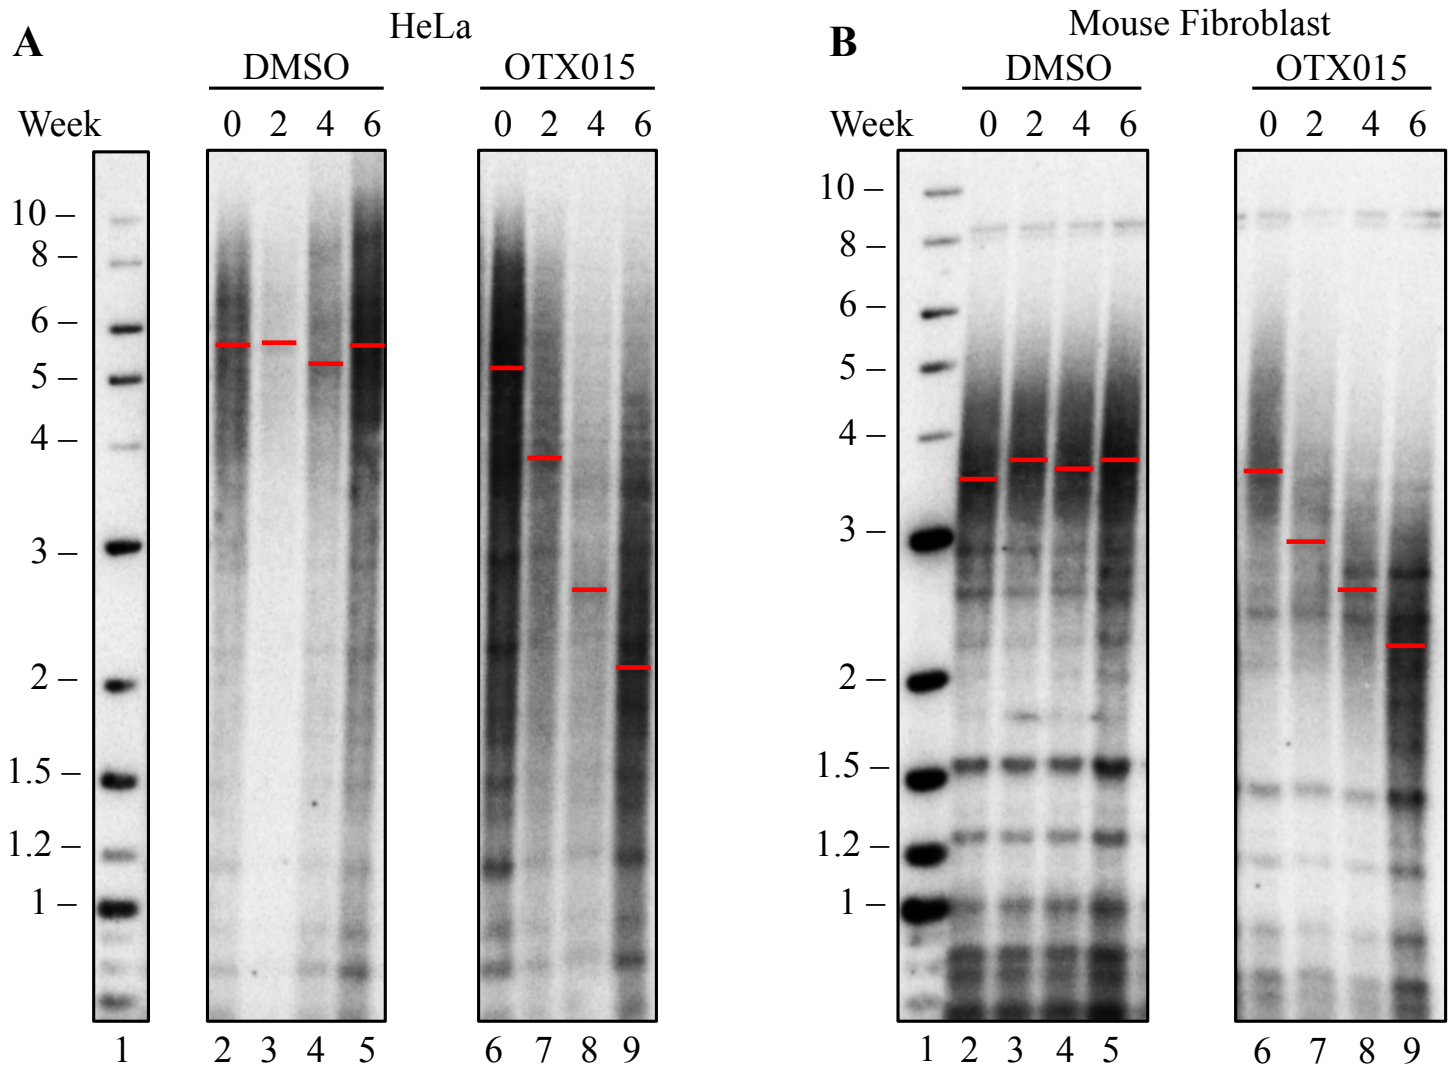

**Supplemental Figure S1.** The Southern blots shown in Figure 4 were analyzed to determine peak density in each lane using ImageQuant software as described in the methods. The median telomere length for each sample is marked with a red bar on each Southern blot.
